1 **Title:** Neonatal granulocytic MDSCs possess phagocytic properties during bacterial  
2 infection.

3 **Authors:**

4 Brittany G. Seman<sup>1</sup>, Jordan K. Vance<sup>1</sup>, Michelle R. Witt<sup>1</sup>, Cory M. Robinson<sup>1, 2</sup>

5 **Author Affiliations:**

6 <sup>1</sup>Department of Microbiology, Immunology, & Cell Biology, West Virginia University  
7 School of Medicine, Morgantown, WV

8 <sup>2</sup>Vaccine Development Center at West Virginia University Health Sciences Center,  
9 Morgantown, WV, USA

10 **Corresponding Author Information:**

11 Address correspondence to Cory M. Robinson, Ph.D., [cory.robinson1@hsc.wvu.edu](mailto:cory.robinson1@hsc.wvu.edu)

12 **Abstract word count: 263**

13 **Text word count: 5911 (not including references)**

14 **Abstract**

15 Myeloid-derived suppressor cells (MDSCs) are an immunosuppressive cell type  
16 found in high abundance in early life. Currently, there has been limited mechanistic  
17 understanding of MDSC phagocytosis of bacteria and the corresponding consequences  
18 in the context of acute infection. We set out to determine whether human granulocytic  
19 MDSCs have phagocytic capacity that is comparable to other professional phagocytes.  
20 To investigate these properties, we utilized fluorescent confocal microscopy, flow  
21 cytometry, and bacterial burden assays. We demonstrate that human granulocytic  
22 MDSCs phagocytose *E. coli* O1:K1:H7, and subsequently traffic the bacteria into acidic  
23 compartments similar to other phagocytes. However, MDSCs were significantly less  
24 efficient at bacterial uptake and killing compared to monocytes. This activity is  
25 associated with an inflammatory response, but the amount of TNF $\alpha$  gene and protein  
26 expression was reduced in infected MDSCs compared to monocytes. Interestingly, we  
27 also found that MDSCs release DNA (MeDNA) into the extracellular space that  
28 resembles neutrophil extracellular traps. We found that MeDNA had some impact on  
29 bacterial viability in single cultures, with an increase in bacterial recovery in MDSCs  
30 treated with DNase. However, MeDNA did not impact the ability of monocytes to  
31 eliminate bacteria in co-cultures, suggesting that MDSC extracellular DNA does not  
32 compromise monocyte function. Overall, our data reveals mechanistic insight into  
33 MDSC activity during infection that includes the kinetics and efficiency of bacterial  
34 uptake, elimination through trafficking to acidified compartments, and inflammatory  
35 contributions relative to primary human monocytes. These results enhance our  
36 understanding of MDSC contributions during acute bacterial infection and identify host-

- 37 directed targets for immune intervention to improve outcomes and reduce susceptibility
- 38 to infection early in life.

## 39 **Introduction**

40 Myeloid-derived suppressor cells are an immune suppressive cell type found in  
41 high abundance during the unique immune period of early life (Gervassi et al., 2014;  
42 Rieber et al., 2013). Originally, MDSCs were observed to promote cancer progression  
43 by suppressing anti-tumor immunity and compromising T cell surveillance (Bronte et al.,  
44 2000; Young, Newby, & Wepsic, 1987). Interestingly, the abundance of MDSCs during  
45 early life correlates with an increased susceptibility of neonates to infection and  
46 mortality due to infection (Schwarz et al., 2018). However, there is limited data on  
47 MDSC interactions with bacteria and the innate immune control of acute infection in the  
48 context of early life immunity. Thus, it is necessary to evaluate the direct interactions of  
49 MDSCs with bacteria and subsequent immunoregulatory activity. This may lead to the  
50 identification of novel host-targeted therapies for early life infections.

51 The neonatal immune system is characterized by a distinct, regulatory state  
52 compared to adults. Although there are increases in T cells, B cells, neutrophils, and  
53 monocytes in neonates compared to adults (Sharma, Jen, Butler, & Lavoie, 2012), there  
54 are differences in activity and function relative to adult counterparts (Simon, Hollander,  
55 & McMichael, 2015). For instance, neonatal neutrophils are defective in L-selectin and  
56 CD11b production, which impairs migration to sites of infection and wounding (Kim,  
57 2003; O'Hare et al., 2015). Neonatal monocytes have lower levels of costimulatory and  
58 antigen-presenting molecules such as HLA-DR, CD86, and CD40 compared to adults,  
59 which aids in the delayed response to stimulatory molecules such as lipopolysaccharide  
60 (LPS) (Velilla, Rugeles, & Chougnet, 2006). The neonatal immune system is also  
61 polarized to a more regulatory Th2 state (Marodi, 2002; Protonotariou et al., 2010).

62 Taken together, these reported findings suggest that the neonatal immune system  
63 exhibits an altered profile compared to adults that is less equipped to combat bacterial  
64 infections.

65 Another unique feature of the neonatal immune system is the abundance of  
66 MDSCs. Circulating MDSCs are found at higher numbers in umbilical cord blood than  
67 peripheral blood of children and adults (Rieber et al., 2013; Schwarz et al., 2018).  
68 MDSCs are also approximately two-fold more abundant in neonatal mouse spleens  
69 compared with adults (Gleave Parson et al., 2019). MDSCs have important  
70 immunosuppressive functions during disease. During tumor growth, the expression of  
71 CD40 on MDSCs has been shown to induce tumor tolerance, as well as increase Treg  
72 production (Pan et al., 2010). MDSCs also suppress NK cell production of interferon-  
73 gamma (IFN $\gamma$ ) through cell-to-cell contact and tumor growth factor-beta (TGF- $\beta$ )  
74 production, subsequently affecting NK antitumor immunity (H. Li, Han, Guo, Zhang, &  
75 Cao, 2009). MDSCs are separated into two main subsets: granulocytic (gMDSCs) and  
76 monocytic (mMDSCs) (Peranzoni et al., 2010). Classical effector functions linked with  
77 immune suppression include the production of arginase, nitric oxide, and reactive  
78 oxygen species. Collectively, these factors suppress multiple immune cell types through  
79 depletion of arginine, the inhibition of JAK-STAT proteins, and the reduction of MHC  
80 class II expression (Darcy et al., 2014; Gabrilovich & Nagaraj, 2009). MDSCs express a  
81 multitude of both proinflammatory and anti-inflammatory cytokines, including tumor  
82 necrosis factor alpha (TNF $\alpha$ ) and interleukin-10 (IL-10) (Janols et al., 2014; Poe et al.,  
83 2013). Our lab has also recently determined MDSCs to be a source of IL-27, a cytokine  
84 known for its suppression of inflammation (Gleave Parson et al., 2019). Taken together,

85 this body of literature suggests that MDSCs are not only abundant in the neonatal  
86 immune system, but are also important suppressive immune cell types during disease in  
87 both adults and neonates.

88 MDSCs have been directly implicated in the altered function of other immune  
89 cells during infection. Our lab has demonstrated that macrophages are impaired in their  
90 ability to clear bacteria *in vitro* in the presence of MDSCs (Gleave Parson et al., 2019).  
91 Monocytes from human umbilical cord blood are impaired in their ability to stimulate T  
92 cell activation and phagocytose bacteria due to the influence of MDSCs (Dietz et al.,  
93 2019). MDSCs have also been involved in the immune shift towards an anti-  
94 inflammatory state during late-onset sepsis induced by cecal ligation and puncture in  
95 mice (Brudecki, Ferguson, McCall, & El Gazzar, 2012). However, few studies have  
96 investigated the direct interactions that occur between MDSCs and microbes during  
97 acute infection. Although MDSCs share a common progenitor with professional  
98 phagocytes, the phagocytic capabilities of MDSCs have yet to be fully analyzed. Davis  
99 and colleagues briefly suggested that MDSCs can phagocytose *Escherichia coli* (*E. coli*)  
100 particles *in vitro*; however, the mechanistic details were not analyzed in depth (Davis,  
101 Silvin, & Allen, 2017). Additionally, two other studies reported that MDSCs can  
102 internalize *Mycobacterium tuberculosis* and *Mycobacterium bovis* Bacillus Calmette-  
103 Guerin (BCG), although the mechanisms, kinetics, and efficiency of internalization were  
104 not addressed (Agrawal et al., 2018; Magcwebeba, Dorhoi, & du Plessis, 2019; Martino  
105 et al., 2010). As such, our mechanistic understanding of direct MDSC interactions with  
106 bacterial pathogens has remained limited, and the consequences during infection have  
107 been unclear.

108           Herein we describe the phagocytic capabilities of human granulocytic MDSCs  
109 during bacterial infection *in vitro*. Using the pathogenic *E. coli* serotype O1:K1:H7, which  
110 is a leading cause of invasive neonatal infections such as sepsis and meningitis that are  
111 responsible for significant mortality (Simonsen, Anderson-Berry, Delair, & Davies, 2014;  
112 Stoll et al., 2011), we examined the phagocytic capacity of MDSCs through 3D time  
113 lapse microscopy, flow cytometry, and bacterial killing assays. Our data suggests that  
114 MDSCs are capable of phagocytic uptake and elimination of bacteria, although they are  
115 functionally limited compared to monocytes. Additionally, we find that MDSCs release  
116 DNA into the extracellular environment, although this function is not associated with  
117 potent bactericidal activity. In contrast, bacterial clearance by monocytes co-cultured  
118 with MDSCs is improved in the absence of extracellular DNA. This study demonstrates  
119 novel MDSC functionality that has not been rigorously evaluated, and gives rise to new  
120 questions surrounding the contributions of MDSCs in the host response during acute  
121 infections.

## 122 **Results**

123 *MDSCs have the ability to phagocytose bacteria* – MDSCs are well characterized by  
124 their ability to suppress immunity, and are functionally defined by their ability to limit T  
125 cell proliferation (Chen et al., 2017; Ostrand-Rosenberg, Sinha, Beury, & Clements,  
126 2012). However, much less is known about how they interact directly with bacterial  
127 pathogens or within the overall immune response during infection. To test whether  
128 MDSCs have the capacity to phagocytose during infection, we isolated granulocytic  
129 MDSCs from human umbilical cord blood. Granulocytic MDSCs were separated from  
130 mature neutrophils by density gradient separation. This isolation strategy yielded

131 CD66<sup>hi</sup>, CD33<sup>+</sup>, CD14<sup>lo</sup> and HLA-DR<sup>-</sup> granulocytic cells that suppress IL-2- and  
132 CD3/CD28 DynaBead-induced CD4<sup>+</sup> T cell proliferation (Supplemental Figure 1). *E. coli*  
133 O1:K1:H7 was labeled with Syto 9 and cultured with MDSCs at increasing multiplicities  
134 of infection (MOI) for 1.5-2 hours. The MDSCs were then examined by flow cytometry  
135 for fluorescent cells. Fluorescent events increased dose-dependently with increasing  
136 MOI, suggesting that MDSCs do have the capacity to internalize bacteria (Figure 1A).  
137 Indeed, phagocytosis of bacteria directly correlated with increasing MOI (Figure 1B). To  
138 further examine the phagocytosis of bacteria while excluding any extracellular-  
139 associated bacteria, *E. coli* were conjugated with the pH-sensitive dye, pHrodo Red.  
140 Using time lapse microscopy, we found that MDSCs contain acidic compartments in  
141 which internalized bacteria were localized to, with internalization occurring as quickly as  
142 8 minutes into imaging (Figure 1C). Taken together, these results demonstrate that  
143 granulocytic MDSCs have the ability to phagocytose bacteria and shuttle them into  
144 acidic compartments, similar to professional phagocytes.

145 *MDSCs are less efficient at uptake and elimination of bacteria than monocytes –*  
146 MDSCs are able to phagocytose and internalize bacteria into acidic compartments.  
147 Next, we wanted to determine the kinetics and efficiency of this activity relative to  
148 professional phagocytes. Neutrophils have limited longevity, and since we are unable to  
149 receive umbilical cord blood immediately post-collection, reduced viability between  
150 collection and transit to the lab may affect the interpretation of later time points during  
151 experiments. Therefore, for these experiments, we isolated and used human CD14<sup>+</sup>  
152 monocytes, which are readily available in the same peripheral blood mononuclear cell  
153 (PBMC) fraction. To determine the ability of MDSCs to eliminate bacteria upon



154 phagocytosis, we infected cells with fluorescently-labeled *E. coli* and longitudinally  
155 quantified uptake and bacterial recovery compared to monocytes. Overall, we found that  
156 MDSCs are significantly less efficient at bacterial uptake compared to monocytes.  
157 Figure 2A illustrates a significant increase in the uptake of large bacterial quantities by  
158 monocytes compared to MDSCs during flow cytometry. This increase in bacterial  
159 uptake was also quantified by confocal microscopy as the number of fluorescent pHrodo  
160 particles phagocytosed per cell (Figure 2B), as well as the area of pHrodo fluorescence  
161 per image between MDSCs and monocytes (Figure 2C).

162 To determine how quickly MDSCs and monocytes phagocytose bacteria, cells  
163 were infected and then longitudinally imaged over a 6-hour period. MDSC uptake of  
164 bacteria increased more gradually than that of monocytes and peaked at 4 hours (h)  
165 (Figure 2D). In contrast, internalization of bacteria by monocytes continued to increase  
166 more significantly through 6 h of infection. To determine whether MDSCs are able to  
167 eliminate bacteria at all or at a level comparable to monocytes, we implemented a  
168 previously described gentamicin protection assay (Gleave Parson et al., 2019). Briefly,  
169 MDSCs or monocytes were infected with bacteria for 1 h, and then treated with  
170 gentamicin to kill extracellular bacteria. Following 2 hours of gentamicin exposure,  
171 MDSCs and monocytes were permeabilized with 1% saponin at varying time points to  
172 quantify bacterial recovery. Previous work in our lab has shown that following 2 h of  
173 gentamicin treatment, nearly all bacteria are non-viable (Gleave Parson et al., 2019).  
174 We found a significantly higher bacterial recovery from MDSCs at 6- and 18- hours post  
175 gentamicin exposure (Figure 3). However, by 24 h, bacterial recovery from MDSCs was  
176 comparable to monocytes (Figure 3). Overall, these results suggest that although

177 MDSCs are capable of bacterial uptake and elimination, they are significantly less  
178 efficient at these functions relative to monocytes.

179 *Granulocytic MDSCs and monocytes express inflammatory cytokines during infection –*

180 Since MDSCs have some ability to eliminate pathogens during infection, we wanted to  
181 determine whether this is associated with a robust inflammatory response. To determine  
182 whether MDSCs express inflammatory cytokines at a level similar to monocytes during  
183 infection, we infected both cell types with *E. coli* and quantified TNF $\alpha$  expression at both  
184 the gene and protein levels. TNF $\alpha$  is a known biomarker for sepsis in patients and a  
185 classical proinflammatory cytokine produced by myeloid cells during infection (Samraj,  
186 Zingarelli, & Wong, 2013). We found that infected MDSCs are capable of expressing  
187 TNF $\alpha$ , but do not respond as robustly as infected monocytes (Figure 4A). Further,  
188 secreted cytokine levels were higher in infected monocytes compared to infected  
189 MDSCs. (Figure 4B). Overall, these data suggest that MDSCs express some level of  
190 inflammatory cytokines, but do not generate an inflammatory response comparable to  
191 monocytes during infection.

192 *Granulocytic MDSCs release DNA during infection –* To our surprise, time lapse

193 imaging of MDSCs cultured with bacteria identified MDSC-generated thin extracellular  
194 structures that interacted with and connected to other MDSCs. Release of extracellular  
195 DNA traps is an important feature of granulocyte-mediated destruction of bacteria  
196 (Brinkmann et al., 2004; Papayannopoulos, 2018). Using the nucleic acid stain Sytox<sup>TM</sup>  
197 Green, we found high amounts of extracellular DNA strings released from what appear  
198 to be dead or dying MDSC cells since their cellular integrity is compromised as  
199 indicated by the availability of Sytox<sup>TM</sup> Green in the nuclear contents (Figure 5A). These

200 strings were eliminated in the presence of DNase I, demonstrating they are composed  
201 of nucleic acid (Figure 5A-B). Our quantification method demonstrated that there is a  
202 high amount of extracellular DNA in the absence of DNase I (Figure 5B). However,  
203 because our method did not exclude DNA within dead or dying cells, the results did not  
204 achieve statistical significance between the untreated and DNase I-treated groups  
205 (Figure 5B). To determine if MDSC extracellular (MeDNA) strings are important for  
206 bacterial elimination, we performed a gentamicin protection assay to enumerate  
207 intracellular killing along with standard plate counting of the culture supernatant to  
208 account for extracellular bacterial killing in the presence or absence of DNase I. The  
209 extracellular and intracellular killing were combined to represent total levels of viable  
210 bacteria in Figure 6. We found that the addition of DNase I to MDSC cultures did result  
211 in a trend toward increasing the total bacterial burdens (Figure 6). In contrast, total  
212 monocyte killing was not impacted by the addition of DNase I (Figure 6). Similarly, when  
213 MDSCs were co-cultured with monocytes, the addition of DNase I did not significantly  
214 alter the total bacterial killing (Figure 6). These results suggest that MeDNA may  
215 contribute to MDSC-dependent bacterial killing, but because of the relative inefficiency  
216 in elimination of bacteria relative to monocytes, in a mixed culture the contribution does  
217 not manifest as significant.

## 218 **Discussion**

219 Myeloid-derived suppressor cells (MDSCs) have been well-studied in the context  
220 of cancer, but their direct involvement in host-pathogen interactions during infection has  
221 been less clear. Here, we describe one of the first in-depth studies on the direct  
222 interactions of MDSCs with bacteria. Our findings rigorously demonstrate that human

223 granulocytic MDSCs have the ability to phagocytose and kill bacteria, although at a  
224 reduced efficiency compared to monocytes. In addition to these functions, we  
225 surprisingly observed release of DNA into the extracellular environment by MDSCs  
226 during infection. The extracellular DNA does promote MDSC-mediated bacterial killing,  
227 although the impact in a mixed cell culture is not yet clear. These activities are  
228 associated with a modest inflammatory response that does not rise to a level  
229 comparable with monocytes.

230 MDSCs phagocytose *E. coli* O1:K1:H7 in a dose-dependent manner. Using both  
231 flow cytometry and confocal microscopy, we were able to rigorously establish that  
232 MDSCs internalize bacteria and shuttle them into acidic compartments similar to  
233 professional phagocytes. We are the first to describe this pattern of intracellular  
234 trafficking in MDSCs. Leiber and colleagues previously reported that human  
235 granulocytic MDSCs could internalize bacteria (Leiber et al., 2017). Although their  
236 findings are in agreement with our results, they investigated the phagocytosis of a  
237 laboratory strain of *E. coli* at a single MOI of 50. Our study has evaluated bacterial  
238 internalization at a range of MOIs that includes low numbers of bacteria, and with a  
239 clinically relevant strain of *E. coli* responsible for invasive infections, such as sepsis and  
240 meningitis (Yao, Xie, & Kim, 2006). Additionally, two other studies have reported the  
241 internalization of *M. tuberculosis* and *M. bovis* BCG by MDSCs, again in agreement with  
242 our results (Agrawal et al., 2018; Magcwebeba et al., 2019; Martino et al., 2010).  
243 However, our study rigorously addressed the kinetics, frequency, and abundance of  
244 internalization using fluorescence microscopy. We further extended our approach to  
245 explore the fate of bacteria following internalization. He and colleagues reported

246 enhanced killing of *E. coli* by human monocytic and granulocytic MDSCs from mice  
247 without procedural details that allow for complete interpretation (He et al., 2018). Based  
248 on these prior studies, we are the first to establish that bacteria internalized by MDSCs  
249 are trafficked to acidified compartments and further measure bacterial killing over time.

250 Our results demonstrate that MDSCs eliminate bacteria with reduced efficiency  
251 compared to monocytes. This analysis normalized the bacteria recovered to that which  
252 was internalized by each cell type at 2 hours post gentamicin treatment to account for  
253 differences in uptake, and allow for direct comparison of the rate of killing. Cellular  
254 mechanisms responsible for reduced internalization and killing by MDSCs compared to  
255 monocytes are currently unknown. Each function is independently impaired in MDSCs.  
256 For instance, since MDSCs are thought to be immature myeloid cells, the potential  
257 decrease in certain pattern recognition receptors (PRRs) on the cell surfaces of MDSCs  
258 could interfere in the ability of these cells to efficiently activate and internalize bacteria.  
259 One marker, CD14, is important in the recognition of lipopolysaccharide (LPS), a Gram-  
260 negative bacterial cell wall component (Devitt et al., 1998; Pugin et al., 1994). CD14 is  
261 highly expressed in monocytes and macrophages (Ost et al., 2016; Simmons, Tan,  
262 Tenen, Nicholson-Weller, & Seed, 1989), but the expression is low on granulocytic  
263 MDSCs (Supplemental Figure 1A). There are no reports of complement or mannose  
264 receptor expression by MDSCs that are frequently utilized for recognition and  
265 internalization of bacteria. These markers, as well as the presence or absence of other  
266 markers normally found in higher abundance on granulocytes and monocytes, could be  
267 partly responsible for the reduced efficiency in phagocytosis by MDSCs. To explain the  
268 reduced efficiency in bacterial clearance by MDSCs, it is possible that while bacteria are

269 trafficked to lysosomes, this is done with reduced kinetics and efficiency. Acidified  
270 compartments within MDSCs may also have a more limited repertoire or abundance of  
271 hydrolytic molecules. Future studies will be necessary to address the cell biology of  
272 MDSCs and how it compares with professional phagocytes.

273         Granulocytic MDSCs release MeDNA during infection. These results are novel,  
274 as only one prior study shows that granulocytic MDSCs produce extracellular DNA  
275 (Alfaro et al., 2016). However, the gMDSCs described in that study do not inhibit T cell  
276 proliferation, a key characteristic of MDSCs, and thus may instead be low-density  
277 neutrophils (Rahman et al., 2019). At least some of the MeDNA appears microscopically  
278 to be associated with cell death; Sytox<sup>TM</sup> Green should not have access to the nucleus  
279 in cells that maintain membrane integrity. Lieber and colleagues (2017) reported an  
280 increased rate of apoptosis in MDSCs infected with *E. coli* (Lieber et al., 2017). Our  
281 observations are not consistent with an apoptotic form of cell death. The nature of this  
282 difference in findings is not clear, but may be influenced by the virulence of the bacteria.  
283 The MeDNA is associated with a reduction in bacterial viability in MDSC-only cultures,  
284 but the overall magnitude was not as striking as anticipated. Granule-packed  
285 neutrophils generate NETs that are strongly antibacterial (Brinkmann et al., 2004; P. Li  
286 et al., 2010). One possible explanation for limited bactericidal activity may be due to  
287 lower granule content in MDSCs compared to neutrophils (Rosales, 2018). Neutrophil  
288 granules are packed with highly antimicrobial contents, including defensins, cathepsins,  
289 and proteinases, and are released with extracellular DNA during NET formation  
290 (Borregaard, Sorensen, & Theilgaard-Monch, 2007). To our knowledge, there are no  
291 studies that describe the contents of the granules found in granulocytic MDSCs.

292 Experiments that explore the contents and abundance of these granules found in  
293 granulocytic MDSCs compared to neutrophils will help us improve our understanding of  
294 the limited toxicity of MeDNA. Extracellular DNA from neutrophils has been implicated in  
295 endothelial cell damage and death (Clark et al., 2007; Gupta et al., 2010). Additionally,  
296 extracellular histones, like the citrullinated histone H3, cause damage to multiple cell  
297 types and can lead to organ failure (Kutcher et al., 2012). Histone release during sepsis  
298 promotes endothelial cell dysfunction, hypoxia in tissues, and cell death (Wildhagen et  
299 al., 2014; Xu et al., 2009). Since the co-culture of MDSCs with monocytes did not  
300 significantly alter clearance of bacteria, this finding suggests that MeDNA does not  
301 compromise monocyte function or viability. Additional studies will be needed to further  
302 evaluate if MeDNA is cytotoxic to other cell types.

303 In conclusion, our body of work demonstrates evidence of MDSC phagocytic  
304 capacity during acute infection. This is not associated with a robust inflammatory  
305 response as compared with monocytes. Additionally, we have unexpectedly discovered  
306 that MDSCs release extracellular DNA that has modest antibacterial activity in a  
307 homogenous culture of MDSCs, but is less influential during co-culture with monocytes.  
308 Ongoing work in our lab continues to characterize these mechanisms to further  
309 understand how MDSCs directly interact with bacteria and other immune cells during  
310 infection. These newly discovered MDSC activities may direct the future use of novel  
311 therapies to improve neonatal immunity and disease outcome during severe infections.

## 312 **Materials and Methods**

313 **Cell Culture** – Human umbilical cord blood was obtained from the Cleveland Cord  
314 Blood Center under West Virginia University Institutional Review Board (IRB) approval.

315 Blood was donated from healthy infants of gestational age  $\geq 37$  weeks. All donors are  
316 anonymous and de-identified. Whole blood was centrifuged at 1500 x g for 10 minutes  
317 to obtain buffy coats. These were further subjected to Ficoll (GE Healthcare Life  
318 Sciences, Chicago, IL) density gradient centrifugation at 400 x g for 30 minutes to  
319 isolate peripheral blood mononuclear cells (PBMCs). CD66abce<sup>+</sup> MDSCs, CD14<sup>+</sup>  
320 monocytes, and CD4<sup>+</sup> T cells were isolated by immunomagnetic selection using their  
321 respective Miltenyi Biotec isolation reagents (Miltenyi Biotec, Bergisch Gladbach,  
322 Germany). MDSCs and monocytes were incubated at a concentration of  $1-7 \times 10^5$   
323 cells/well in FluoroBrite Dulbecco's Modified Eagle Medium (DMEM, ThermoFisher  
324 Scientific, Waltham, MA) supplemented with 10% human serum, 25 mM HEPES, and 2  
325 mM L-glutamine. T cells were cultured at a concentration of  $1 \times 10^5$  cells/well in RPMI-  
326 1640 (Mediatech, Manassas, VA), supplemented with 10% human serum, 100 U/mL  
327 penicillin/streptomycin, 2 mM L-glutamine, 25 mM HEPES, 1 mM sodium pyruvate, and  
328 0.05 mM 2-mercaptoethanol. Human cultures were incubated at 37°C in 48- or 96-well  
329 plastic bottom plates, or in a 35 mm ibidi Quad  $\mu$ -Dish (ibidi, Fitchburg, WI) for  
330 confocal/epifluorescence imaging.

331 ***Fluorescent Labeling and Bacterial Infection*** – Human MDSCs and monocytes were  
332 infected with an MOI  $\sim 2-200$  of *Escherichia coli* strain O1:K1:H7. The bacteria were  
333 taken from pre-titered frozen cultures and washed 1x in phosphate-buffered saline  
334 (PBS; Corning, Manassas, VA), centrifuged at 12,000 x rpm, and resuspended in a  
335 volume equivalent to an inoculum of 50  $\mu$ L/well. Bacteria were labeled with 5  $\mu$ M Syto<sup>TM</sup>  
336 9 Green Fluorescent Nucleic Acid Stain or 500 nM pHrodo Red SE (ThermoFisher  
337 Scientific, Waltham, MA) and washed 3-5 times with PBS prior to infection. For



338 extracellular bacterial recovery assays, bacteria were taken directly from culture  
339 supernatants, diluted ten-fold in PBS, and enumerated by standard plate counting on  
340 tryptic soy agar (TSA; Becton, Dickinson and Company, Sparks, MD) incubated at 37°C  
341 overnight. To visualize extracellular DNA, 500 nM of Sytox™ Green Nucleic Acid Stain  
342 (ThermoFisher Scientific, Waltham, MA) was added prior to microscopy.

343 **Gentamicin Protection Assay** – Human MDSCs and monocytes were infected at an  
344 MOI of 20 for 1 hour at 37°C. At 1 hour post-infection, supernatants were discarded and  
345 cells were supplemented with new media containing 100 µg/mL gentamicin (Quality  
346 Biological, Gaithersburg, MD) to eliminate extracellular bacteria. Cells were incubated  
347 for 2, 6, 18, and 24 hours and then permeabilized using 1% saponin in PBS (MP  
348 Biomedicals, Solon, OH). Cell lysates were diluted ten-fold in PBS and bacteria was  
349 enumerated by standard plate counting. In experiments incorporating DNase I, media  
350 was supplemented with 100 units of DNase I (Roche, Basel, Switzerland) during initial  
351 incubation and media replacement with gentamicin.

352 **Flow Cytometry** – Cells and bacteria were incubated at 37°C for varying time points. At  
353 each time point, cells were collected in 500 µL of 4% paraformaldehyde (Affymetrix,  
354 Cleveland, OH) and kept at 4°C until use. Cells were resuspended in 400 µL PBS and  
355 approximately 10,000 events were collected on an LSRFortessa (Becton, Dickinson and  
356 Company, Sparks, MD). Percent cells gated in FITC- (488 laser, 490/525 nm  
357 excitation/emission), PE- (561 laser, 496/578 nm excitation/emission), or Pacific Blue-  
358 (405 laser, 410/455 nm excitation/emission) channels were used for data analysis. For  
359 cell marker profiling, MDSCs were immunolabeled with PE-conjugated anti-HLA-DR  
360 (Invitrogen, San Diego, CA), anti-human CD66b-PE (BioLegend, San Diego, CA), FITC-

361 conjugated anti-CD14 (R&D Systems, Minneapolis, MN), and FITC-conjugated anti-  
362 CD33 (BioLegend, San Diego, CA).

363 **T Cell Proliferation Assay** – CD4<sup>+</sup> T cells were labeled with 5  $\mu$ M CellTrace Violet  
364 (ThermoFisher Scientific, Waltham, MA) for 20 minutes at 37°C. The labeling was  
365 quenched with 10% fetal bovine serum (FBS; Gemini Bio-Products, West Sacramento,  
366 CA) in PBS and cells were resuspended in T cell media. Cells were then plated at  $1 \times 10^5$   
367 cells/well in a non-tissue culture treated 96-well plate (Corning, Corning, NY) and  
368 incubated for 2 hours at 37°C. CD66<sup>+</sup> MDSCs were then added at a concentration of  
369  $1 \times 10^5$  cells/well. To promote proliferation, the culture was supplemented with 100 units  
370 of interleukin-2 (IL-2; Shenandoah Biotech, Warwick, PA) or  $3 \times 10^5$  CD3/CD28  
371 Dynabeads/well (ThermoFisher Scientific, Waltham, MA). Cells were incubated for up to  
372 4 days at 37°C. Cells were harvested on days 1, 2, 3, and 4 and fixed in 4%  
373 paraformaldehyde until analysis via flow cytometry.

374 **Quantitative Real Time PCR** – MDSCs and monocytes were cultured with or without *E.*  
375 *coli* at an MOI ~10 in a 48-well plastic-bottom plates for 6 hours. At 6 hours, cells were  
376 resuspended in 200  $\mu$ L of TRI Reagent (Molecular Research Center, Cincinnati, OH).  
377 Following phase separation, the aqueous layer was mixed with an equal volume of cold  
378 75% ethanol and transferred to MicroElute LE RNA Columns (Omega Bio-Tek,  
379 Norcross, GA). After RNA extraction, first-strand cDNA was synthesized using iScript  
380 reagents (Bio-Rad, Hercules, CA). Quantitative PCR reactions included cDNA diluted 2-  
381 fold from synthesis, gene-specific Taqman primer probe sets (Applied Biosystems,  
382 Foster City, CA), and iQ Supermix (Bio-Rad, Hercules, CA). Cycling was performed in  
383 duplicate using a Step One Plus™ Real Time detection system (Applied Biosystems,

384 Foster City, CA). Gene-specific amplification was normalized to GAPDH as an internal  
385 reference gene and gene expression was normalized relative to uninfected MDSC  
386 controls using the formula  $2^{-\Delta\Delta Ct}$ .

387 **Cytokine Measurements** – Supernatants from infections were collected and clarified  
388 by standard techniques. TNF $\alpha$  protein levels were measured in duplicate or triplicate  
389 using a Ready-Set-Go! ELISA kit (eBioscience, San Diego, CA). Results were analyzed  
390 and normalized to standard curves for the cytokine and concentrations of cytokine was  
391 graphed accordingly.

392 **Fluorescence Microscopy** – A Nikon A1R confocal microscope was used for confocal  
393 and epifluorescence imaging (Nikon, Melville, NY). Objective lenses with powers of 20X  
394 (numerical aperture [NA], 0.75), 40X (oil, NA, 1.3), and 60X (oil, NA, 1.4) were used.  
395 Images are overlays of differential interference contrast (DIC) and fluorescence images  
396 or fluorescence image panels. Syto 9<sup>TM</sup>/Sytox Green<sup>TM</sup> and pHrodo Red were detected  
397 by optical lasers/filters for excitation/emission at 490/525 nm (FITC) and 555/580 nm  
398 (TRITC), respectively. Images were analyzed in ImageJ (FIJI, [www.fiji.sc](http://www.fiji.sc)). Briefly,  
399 images were thresholded for bacterial fluorescence, and each area was quantified with  
400 identical settings per experiment and processed identically. For 6-hour time lapses, cells  
401 were imaged on a Lionheart FX automated microscope (BioTek, Winooski, VT). Images  
402 were acquired using a 20X objective (NA, 0.45) and analyzed using Gen5 Image+  
403 software (version 3.05.11; BioTek, Winooski, VT).

404 **Statistical Analysis** – All statistical analyses were performed using GraphPad Prism  
405 software (version 8; La Jolla, CA). Data was tested using non-parametric or parametric  
406 measures, as indicated in the figure legends.

## 407 **Acknowledgements**

408 We would like to thank members of the Robinson lab for stimulating discussions,  
409 Dr. Matthew Daddysman for help with Gen5 Image+ image analysis, Drs. Amanda  
410 Ammer and Karen Martin for microscopy guidance, and Dr. Kathy Brundage for flow  
411 cytometry guidance. This work was supported by West Virginia University Institutional  
412 funds.

## 413 **Figure Legends**

414 **Figure 1: MDSCs phagocytose bacteria in a dose-dependent manner.** CD66<sup>+</sup>  
415 MDSCs isolated from human umbilical cord blood PBMCs were infected with varying  
416 multiplicities of infection (MOI) of pHrodo<sup>TM</sup> Red- or Syto 9<sup>TM</sup>-labeled *E. coli* O1:K1:H7  
417 and incubated at 37°C. For imaging, cells were longitudinally imaged over 10-20  
418 minutes on a Nikon A1R confocal microscope at 40X to capture phagocytosis in real  
419 time. For flow cytometry, cells were fixed in 4% paraformaldehyde and resuspended in  
420 PBS prior to collection. **(A, B, and C)** Images and graphs are representative of 3  
421 independent experiments. **(A)** A representative infection histogram overlay of four  
422 bacterial MOIs is shown. Bacteria labeled with Syto 9<sup>TM</sup> were quantified from gated  
423 MDSCs. MOI 2 = black line, MOI 20 = light grey line, MOI 50 = royal blue line, MOI 200  
424 = blue-grey line. Grey box with purple dotted outline is the area of highly phagocytic  
425 MDSCs. **(B)** A scatter plot with best fit line correlating MOI to the number of highly  
426 phagocytic MDSCs is shown. Each dark grey diamond symbol represents an average  
427 number of phagocytic MDSCs per MOI. The R<sup>2</sup> value is displayed. **(C)** Representative  
428 images of MDSC phagocytosis of pHrodo<sup>TM</sup> Red-labeled bacteria over a period of 15  
429 minutes are shown. An MDSC of interest is outlined with a yellow dotted line. Panels

430 are captured at time points described in seconds in the top right of images. Scale bar =  
431 100  $\mu\text{m}$ .

432 **Figure 2: MDSCs are less efficient at bacterial uptake compared to monocytes.**

433 CD66<sup>+</sup> MDSCs and CD14<sup>+</sup> monocytes isolated from human umbilical cord blood  
434 PBMCs were infected with an MOI of 10 of Syto 9<sup>TM</sup>- or pHrodo Red-labeled *E. coli*  
435 O1:K1:H7 and incubated at 37°C. For flow cytometry, cells were fixed in 4%  
436 paraformaldehyde and resuspended in PBS prior to collection. For imaging, cells were  
437 imaged and analyzed for pHrodo fluorescence using FIJI. For longitudinal imaging, cells  
438 were imaged every 10 minutes over a 6-hour period and quantified for pHrodo  
439 fluorescence. **(A)** Histogram and dot plots are representative of 2 independent  
440 experiments with three replicates per experiment. **(B and C)** Graphs are representative  
441 of 3 independent experiments. n = 63 and 70 images analyzed for MDSCs and  
442 monocytes, respectively. **(D)** The graph shown is representative of 2 independent  
443 experiments. n = 9 fields of view per cell type averaged at each time point per  
444 experiment. **(A)** Flow cytometry histograms and representative dot plot for MDSCs and  
445 monocytes display percent of cells that have not phagocytosed bacteria (none), have  
446 phagocytosed a low amount of bacteria (low), or have phagocytosed a high amount of  
447 bacteria (high). Grey circle symbols = monocytes, royal blue square symbols = MDSCs.  
448 **(B)** Quantification of the number of fluorescent bacterial particles phagocytosed by  
449 MDSCs and monocytes during infection. **(C)** Quantification of the area of pHrodo  
450 fluorescence in pixels phagocytosed by MDSCs and monocytes during infection. **(D)**  
451 Longitudinal phagocytosis of pHrodo bacteria during a 6-hour time course. Images were  
452 taken every 10 minutes of both MDSCs (blue line) and monocytes (grey line).

453 Fluorescent bacteria per cell type were quantified at each time point from 9 fields of  
454 view. Statistical analyses in **(A, B, and C)** were performed using a Mann-Whitney U  
455 test. \*\*  $p \leq 0.01$ , \*\*\*\*  $p \leq 0.0001$ , n.s. not significant. Median with interquartile range  
456 displayed in all graphs.

457 **Figure 3: MDSCs are less efficient at bacterial elimination compared to**  
458 **monocytes.** CD66<sup>+</sup> MDSCs and CD14<sup>+</sup> monocytes isolated from human umbilical cord  
459 blood PBMCs were infected with an MOI of 20 of *E. coli* O1:K1:H7 and incubated at  
460 37°C for 1 hour. Media was replaced at this time point for gentamicin-supplemented  
461 media and cells were incubated for 2, 6, 18, and 24 hours post gentamicin exposure. At  
462 each time point, cells were permeabilized with 1% saponin, diluted ten-fold, and plated  
463 on TSA for standard bacterial enumeration. The graph represents bacterial recovery  
464 between MDSCs and monocytes at 6, 18, and 24 hours post exposure. All time points  
465 were normalized to the 2 hour time point. The data shown is representative of 5  
466 independent experiments. Statistical analysis was performed using a Mann-Whitney U  
467 test. \*  $p \leq 0.05$ , \*\*  $p \leq 0.01$ , n.s. not significant.

468 **Figure 4: MDSCs and monocytes produce inflammatory cytokines during**  
469 **infection.** CD66<sup>+</sup> MDSCs and CD14<sup>+</sup> monocytes isolated from human umbilical cord  
470 blood PBMCs were infected with an MOI 10 of *E. coli* O1:K1:H7 and incubated at 37°C  
471 for 6 hours. Supernatants were collected for inflammatory cytokine measurements.  
472 Cells were then lysed in TRI Reagent for RNA extraction, cDNA synthesis, and gene  
473 expression analysis of inflammatory cytokines. **(A)** Gene expression analysis of TNF $\alpha$   
474 levels during infections. Infection levels were normalized relative to uninfected MDSC  
475 controls. Representative of 4 independent experiments, 10 replicates total per group.

476 **(B)** Serum cytokine levels of TNF $\alpha$  measured via ELISA for infections of both MDSCs  
477 and monocytes. Cytokine levels were normalized based on standard curves for each  
478 protein. A representative of 2 independent experiments with 8 replicates total per group  
479 is shown. Statistical analysis was performed using an unpaired t-test for all panels. \*  $p \leq$   
480 0.05, \*\*\*\*  $p \leq 0.0001$ .

481 **Figure 5: MDSCs produce extracellular DNA during infection.** CD66<sup>+</sup> MDSCs  
482 isolated from human umbilical cord blood PBMCs were infected with an MOI 10 of *E.*  
483 *coli* O1:K1:H7 and incubated at 37°C for ~1.5 hours. To visualize extracellular DNA, 500  
484 nM of Sytox<sup>TM</sup> Green was incorporated into cell media prior to imaging. To degrade  
485 DNA, 100 units of DNase I was supplemented in media. Cells were imaged on a Nikon  
486 A1R confocal microscope at 20X and quantified for Sytox Green fluorescence in FIJI. **(A**  
487 **and B)** Representative images and quantification of Sytox Green fluorescence from 2  
488 independent experiments are shown.  $n = 40$  images per DNase treated and untreated  
489 groups. In **(B)**, black circle symbols = individual images for untreated cells, royal blue  
490 square symbols = individual images for DNase-treated cells. Scale bar = 100  $\mu\text{m}$ .  
491 Statistical analysis of **(B)** was performed using a Mann-Whitney U test; median with  
492 interquartile range is displayed.

493 **Figure 6: MDSC-derived extracellular DNA affects bacterial viability in MDSC-only**  
494 **cultures, but does not affect monocyte phagocytosis and killing of bacteria.**

495 CD66<sup>+</sup> MDSCs and CD14<sup>+</sup> monocytes isolated from human umbilical cord blood  
496 PBMCs were either single or co-culture infected with an MOI of 10 of *E. coli* O1:K1:H7  
497 and incubated at 37°C for 6 hours. DNase I (100 U) was added to appropriate cultures.  
498 For extracellular bacterial burdens, 50  $\mu\text{L}$  of supernatant was collected from each

499 infection, diluted ten-fold in PBS, and plated on TSA for standard plate counting. For  
500 intracellular burdens, 100  $\mu$ L of 1% saponin was added to each well for 15 minutes, cell  
501 lysates were diluted ten-fold in PBS, and bacteria was plated on TSA for standard  
502 enumeration. Colony forming units (CFUs) of combined extracellular and intracellular  
503 bacteria in single or co-culture infections of MDSCs and monocytes untreated or treated  
504 with DNase I at 6 hours post-infection. Statistical analysis was performed using a two-  
505 way ANOVA. *P*-values are as follows: interaction variation,  $p=0.3818$ , row factor  
506 variation (untreated vs. treated),  $p=0.4288$ , column factor variation (MDSCs vs.  
507 Monocytes vs. Mixed cultures),  $p=0.1156$ .

508 **Supplemental Figure 1: Neonatal human MDSCs have characteristic cell surface**  
509 **markers and suppress T cell proliferation.** CD66<sup>+</sup> MDSCs from human umbilical cord  
510 blood PBMCs were either labeled with cell surface markers for cell marker profiling or  
511 were co-cultured at a 1:1 ratio with CD4<sup>+</sup> T cells for 4 days for a T cell proliferation  
512 assay. For cell marker profiling, MDSCs were labeled with antibodies for CD66, HLA-  
513 DR, CD33, and CD14, fixed in 4% paraformaldehyde, and resuspended in PBS prior to  
514 collection on the flow cytometer. For T cell proliferation assays, MDSCs were incubated  
515 with T cells stimulated with IL-2 (100 U) for 4 days. Cells were collected each day and  
516 fixed in 4% paraformaldehyde for flow cytometry analysis. Cells supplemented with  
517 CD3/CD28 DynaBeads were imaged on a Lionheart FX automated microscope to  
518 visualize clonal expansion of T cells surrounding beads during proliferation. **(A)** Shown  
519 are representative histogram overlay plots of cell surface markers for MDSCs compared  
520 to no stain controls. The top panel shows PE-labeled CD66 and HLA-DR expression on  
521 cell surfaces. The bottom panel shows FITC-labeled CD33 and CD14 expression on cell



522 surfaces. Shifts to the right represent increasing fluorescence. Black lines = CD66 or  
523 CD33 expression in top and bottom panels, respectively, blue lines = HLA-DR or CD14  
524 expression in top and bottom panels, respectively, grey lines = no stain control in both  
525 panels. A representative histogram of 2 independent experiments is shown. **(B)** Shown  
526 are representative histogram plots of T cell proliferation. Stimulated T cells at Day 0, IL-  
527 2 stimulated T cells at day 3, and IL-2 stimulated T cells supplemented with MDSCs at  
528 day 3 are displayed. The red vertical line on all plots is used to visualize the shift in  
529 proliferation in all plots. The data shown is representative of 5 independent experiments.  
530 **(C)** Representative DIC images of T cells supplemented with DynaBeads  $\pm$  MDSCs are  
531 shown. Black coverage is representative of beads associated with proliferating T cells.  
532 The data shown is representative of 5 independent experiments. Scale bar = 100  $\mu$ m.

### 533 **References**

- 534 Agrawal, N., Streat, I., Pei, G., Weiner, J., Kotze, L., Bandermann, S., . . . Dorhoi, A.  
535 (2018). Human Monocytic Suppressive Cells Promote Replication of  
536 *Mycobacterium tuberculosis* and Alter Stability of in vitro Generated Granulomas.  
537 *Frontiers in Immunology*, 9. doi:10.3389/fimmu.2018.02417
- 538 Alfaro, C., Teijeira, A., Onate, C., Perez, G., Sanmamed, M. F., Andueza, M. P., . . .  
539 Melero, I. (2016). Tumor-Produced Interleukin-8 Attracts Human Myeloid-Derived  
540 Suppressor Cells and Elicits Extrusion of Neutrophil Extracellular Traps (NETs).  
541 *Clin Cancer Res*, 22(15), 3924-3936. doi:10.1158/1078-0432.CCR-15-2463
- 542 Borregaard, N., Sorensen, O. E., & Theilgaard-Monch, K. (2007). Neutrophil granules: a  
543 library of innate immunity proteins. *Trends Immunol*, 28(8), 340-345.  
544 doi:10.1016/j.it.2007.06.002

- 545 Brinkmann, V., Reichard, U., Goosmann, C., Fauler, B., Uhlemann, Y., Weiss, D. S., . . .  
546 Zychlinsky, A. (2004). Neutrophil extracellular traps kill bacteria. *Science*,  
547 *303*(5663), 1532-1535. doi:10.1126/science.1092385
- 548 Bronte, V., Apolloni, E., Cabrelle, A., Ronca, R., Serafini, P., Zamboni, P., . . .  
549 Zanovello, P. (2000). Identification of a CD11b(+)/Gr-1(+)/CD31(+) myeloid  
550 progenitor capable of activating or suppressing CD8(+) T cells. *Blood*, *96*(12),  
551 3838-3846. Retrieved from <https://www.ncbi.nlm.nih.gov/pubmed/11090068>
- 552 Brudecki, L., Ferguson, D. A., McCall, C. E., & El Gazzar, M. (2012). Myeloid-derived  
553 suppressor cells evolve during sepsis and can enhance or attenuate the systemic  
554 inflammatory response. *Infection and Immunity*, *80*(6), 2026-2034.  
555 doi:10.1128/IAI.00239-12
- 556 Chen, J., Ye, Y., Liu, P., Yu, W., Wei, F., Li, H., & Yu, J. (2017). Suppression of T cells  
557 by myeloid-derived suppressor cells in cancer. *Hum Immunol*, *78*(2), 113-119.  
558 doi:10.1016/j.humimm.2016.12.001
- 559 Clark, S. R., Ma, A. C., Tavener, S. A., McDonald, B., Goodarzi, Z., Kelly, M. M., . . .  
560 Kubes, P. (2007). Platelet TLR4 activates neutrophil extracellular traps to  
561 ensnare bacteria in septic blood. *Nat Med*, *13*(4), 463-469. doi:10.1038/nm1565
- 562 Darcy, C. J., Minigo, G., Piera, K. A., Davis, J. S., McNeil, Y. R., Chen, Y., . . .  
563 Woodberry, T. (2014). Neutrophils with myeloid derived suppressor function  
564 deplete arginine and constrain T cell function in septic shock patients. *Crit Care*,  
565 *18*(4), R163. doi:10.1186/cc14003

- 566 Davis, R. J., Silvin, C., & Allen, C. T. (2017). Avoiding phagocytosis-related artifact in  
567 myeloid derived suppressor cell T-lymphocyte suppression assays. *J Immunol*  
568 *Methods*, 440, 12-18. doi:10.1016/j.jim.2016.11.006
- 569 Devitt, A., Moffatt, O. D., Raykundalia, C., Capra, J. D., Simmons, D. L., & Gregory, C.  
570 D. (1998). Human CD14 mediates recognition and phagocytosis of apoptotic  
571 cells. *Nature*, 392(6675), 505-509. doi:10.1038/33169
- 572 Dietz, S., Schwarz, J., Vogelmann, M., Spring, B., Molnar, K., Orlikowsky, T. W., . . .  
573 Kostlin-Gille, N. (2019). Cord blood granulocytic myeloid-derived suppressor cells  
574 impair monocyte T cell stimulatory capacity and response to bacterial stimulation.  
575 *Pediatr Res*. doi:10.1038/s41390-019-0504-7
- 576 Gabrilovich, D. I., & Nagaraj, S. (2009). Myeloid-derived suppressor cells as regulators  
577 of the immune system. *Nat Rev Immunol*, 9(3), 162-174. doi:10.1038/nri2506
- 578 Gervassi, A., Lejarcegui, N., Dross, S., Jacobson, A., Itaya, G., Kidzeru, E., . . . Horton,  
579 H. (2014). Myeloid derived suppressor cells are present at high frequency in  
580 neonates and suppress in vitro T cell responses. *PLoS ONE*, 9(9), e107816.  
581 doi:10.1371/journal.pone.0107816
- 582 Gleave Parson, M., Grimmett, J., Vance, J. K., Witt, M. R., Seman, B. G., Rawson, T.  
583 W., . . . Robinson, C. M. (2019). Murine myeloid-derived suppressor cells are a  
584 source of elevated levels of interleukin-27 in early life and compromise control of  
585 bacterial infection. *Immunol Cell Biol*, 97(5), 445-456. doi:10.1111/imcb.12224
- 586 Gupta, A. K., Joshi, M. B., Philippova, M., Erne, P., Hasler, P., Hahn, S., & Resink, T. J.  
587 (2010). Activated endothelial cells induce neutrophil extracellular traps and are

588           susceptible to NETosis-mediated cell death. *FEBS Lett*, *584*(14), 3193-3197.  
589           doi:10.1016/j.febslet.2010.06.006

590 He, Y. M., Li, X., Perego, M., Nefedova, Y., Kossenkov, A. V., Jensen, E. A., . . . Zhou,  
591           J. (2018). Transitory presence of myeloid-derived suppressor cells in neonates is  
592           critical for control of inflammation. *Nat Med*, *24*(2), 224-231.  
593           doi:10.1038/nm.4467

594 Janols, H., Bergenfelz, C., Allaoui, R., Larsson, A. M., Ryden, L., Bjornsson, S., . . .  
595           Leandersson, K. (2014). A high frequency of MDSCs in sepsis patients, with the  
596           granulocytic subtype dominating in gram-positive cases. *J Leukoc Biol*, *96*(5),  
597           685-693. doi:10.1189/jlb.5HI0214-074R

598 Kim, S. K. (2003). Comparison of L-Selectin and CD11b on Neutrophils of Adults and  
599           Neonates during the First Month of Life. *Pediatric Research*, *53*(1), 132-136.  
600           doi:10.1203/00006450-200301000-00022

601 Kutcher, M. E., Xu, J., Vilardi, R. F., Ho, C., Esmon, C. T., & Cohen, M. J. (2012).  
602           Extracellular histone release in response to traumatic injury: implications for a  
603           compensatory role of activated protein C. *J Trauma Acute Care Surg*, *73*(6),  
604           1389-1394. doi:10.1097/TA.0b013e318270d595

605 Leiber, A., Schwarz, J., Kostlin, N., Spring, B., Fehrenbach, B., Katava, N., . . . Gille, C.  
606           (2017). Neonatal myeloid derived suppressor cells show reduced apoptosis and  
607           immunosuppressive activity upon infection with *Escherichia coli*. *Eur J Immunol*,  
608           *47*(6), 1009-1021. doi:10.1002/eji.201646621

- 609 Li, H., Han, Y., Guo, Q., Zhang, M., & Cao, X. (2009). Cancer-expanded myeloid-  
610 derived suppressor cells induce anergy of NK cells through membrane-bound  
611 TGF-beta 1. *J Immunol*, *182*(1), 240-249. doi:10.4049/jimmunol.182.1.240
- 612 Li, P., Li, M., Lindberg, M. R., Kennett, M. J., Xiong, N., & Wang, Y. (2010). PAD4 is  
613 essential for antibacterial innate immunity mediated by neutrophil extracellular  
614 traps. *J Exp Med*, *207*(9), 1853-1862. doi:10.1084/jem.20100239
- 615 Magcwebeba, T., Dorhoi, A., & du Plessis, N. (2019). The Emerging Role of Myeloid-  
616 Derived Suppressor Cells in Tuberculosis. *Front Immunol*, *10*, 917.  
617 doi:10.3389/fimmu.2019.00917
- 618 Marodi, L. (2002). Down-regulation of Th1 responses in human neonates. *Clin Exp*  
619 *Immunol*, *128*(1), 1-2. doi:10.1046/j.1365-2249.2002.01873.x
- 620 Martino, A., Badell, E., Abadie, V., Balloy, V., Chignard, M., Mistou, M. Y., . . . Winter, N.  
621 (2010). Mycobacterium bovis bacillus Calmette-Guerin vaccination mobilizes  
622 innate myeloid-derived suppressor cells restraining in vivo T cell priming via IL-  
623 1R-dependent nitric oxide production. *J Immunol*, *184*(4), 2038-2047.  
624 doi:10.4049/jimmunol.0903348
- 625 O'Hare, F. M., Watson, W., O'Neill, A., Grant, T., Onwuneme, C., Donoghue, V., . . .  
626 Molloy, E. J. (2015). Neutrophil and monocyte toll-like receptor 4, CD11b and  
627 reactive oxygen intermediates, and neuroimaging outcomes in preterm infants.  
628 *Pediatr Res*, *78*(1), 82-90. doi:10.1038/pr.2015.66
- 629 Ost, M., Singh, A., Peschel, A., Mehling, R., Rieber, N., & Hartl, D. (2016). Myeloid-  
630 Derived Suppressor Cells in Bacterial Infections. *Front Cell Infect Microbiol*, *6*,  
631 37. doi:10.3389/fcimb.2016.00037

- 632 Ostrand-Rosenberg, S., Sinha, P., Beury, D. W., & Clements, V. K. (2012). Cross-talk  
633 between myeloid-derived suppressor cells (MDSC), macrophages, and dendritic  
634 cells enhances tumor-induced immune suppression. *Semin Cancer Biol*, 22(4),  
635 275-281. doi:10.1016/j.semcancer.2012.01.011
- 636 Pan, P. Y., Ma, G., Weber, K. J., Ozao-Choy, J., Wang, G., Yin, B., . . . Chen, S. H.  
637 (2010). Immune stimulatory receptor CD40 is required for T-cell suppression and  
638 T regulatory cell activation mediated by myeloid-derived suppressor cells in  
639 cancer. *Cancer Res*, 70(1), 99-108. doi:10.1158/0008-5472.CAN-09-1882
- 640 Papayannopoulos, V. (2018). Neutrophil extracellular traps in immunity and disease.  
641 *Nat Rev Immunol*, 18(2), 134-147. doi:10.1038/nri.2017.105
- 642 Peranzoni, E., Zilio, S., Marigo, I., Dolcetti, L., Zanovello, P., Mandruzzato, S., & Bronte,  
643 V. (2010). Myeloid-derived suppressor cell heterogeneity and subset definition.  
644 *Curr Opin Immunol*, 22(2), 238-244. doi:10.1016/j.coi.2010.01.021
- 645 Poe, S. L., Arora, M., Oriss, T. B., Yarlagadda, M., Isse, K., Khare, A., . . . Ray, P.  
646 (2013). STAT1-regulated lung MDSC-like cells produce IL-10 and efferocytose  
647 apoptotic neutrophils with relevance in resolution of bacterial pneumonia.  
648 *Mucosal Immunol*, 6(1), 189-199. doi:10.1038/mi.2012.62
- 649 Protonotariou, E., Chrelias, C., Kassanos, D., Kapsambeli, H., Trakakis, E., &  
650 Sarandakou, A. (2010). Immune response parameters during labor and early  
651 neonatal life. *In Vivo*, 24(1), 117-123. Retrieved from  
652 <https://www.ncbi.nlm.nih.gov/pubmed/20133986>

- 653 Pugin, J., Heumann, I. D., Tomasz, A., Kravchenko, V. V., Akamatsu, Y., Nishijima, M., .  
654 . . Ulevitch, R. J. (1994). CD14 is a pattern recognition receptor. *Immunity*, 1(6),  
655 509-516. doi:10.1016/1074-7613(94)90093-0
- 656 Rahman, S., Sagar, D., Hanna, R. N., Lightfoot, Y. L., Mistry, P., Smith, C. K., . . .  
657 Casey, K. A. (2019). Low-density granulocytes activate T cells and demonstrate  
658 a non-suppressive role in systemic lupus erythematosus. *Ann Rheum Dis*, 78(7),  
659 957-966. doi:10.1136/annrheumdis-2018-214620
- 660 Rieber, N., Gille, C., Kostlin, N., Schafer, I., Spring, B., Ost, M., . . . Hartl, D. (2013).  
661 Neutrophilic myeloid-derived suppressor cells in cord blood modulate innate and  
662 adaptive immune responses. *Clin Exp Immunol*, 174(1), 45-52.  
663 doi:10.1111/cei.12143
- 664 Rosales, C. (2018). Neutrophil: A Cell with Many Roles in Inflammation or Several Cell  
665 Types? *Front Physiol*, 9, 113. doi:10.3389/fphys.2018.00113
- 666 Samraj, R. S., Zingarelli, B., & Wong, H. R. (2013). Role of biomarkers in sepsis care.  
667 *Shock*, 40(5), 358-365. doi:10.1097/SHK.0b013e3182a66bd6
- 668 Schwarz, J., Scheckenbach, V., Kugel, H., Spring, B., Pagel, J., Hartel, C., . . . Kostlin,  
669 N. (2018). Granulocytic myeloid-derived suppressor cells (GR-MDSC)  
670 accumulate in cord blood of preterm infants and remain elevated during the  
671 neonatal period. *Clin Exp Immunol*, 191(3), 328-337. doi:10.1111/cei.13059
- 672 Sharma, A. A., Jen, R., Butler, A., & Lavoie, P. M. (2012). The developing human  
673 preterm neonatal immune system: a case for more research in this area. *Clin*  
674 *Immunol*, 145(1), 61-68. doi:10.1016/j.clim.2012.08.006

- 675 Simmons, D. L., Tan, S., Tenen, D. G., Nicholson-Weller, A., & Seed, B. (1989).  
676 Monocyte antigen CD14 is a phospholipid anchored membrane protein. *Blood*,  
677 73(1), 284-289. Retrieved from <https://www.ncbi.nlm.nih.gov/pubmed/2462937>
- 678 Simon, A. K., Hollander, G. A., & McMichael, A. (2015). Evolution of the immune system  
679 in humans from infancy to old age. *Proc Biol Sci*, 282(1821), 20143085.  
680 doi:10.1098/rspb.2014.3085
- 681 Simonsen, K. A., Anderson-Berry, A. L., Delair, S. F., & Davies, H. D. (2014). Early-  
682 onset neonatal sepsis. *Clin Microbiol Rev*, 27(1), 21-47.  
683 doi:10.1128/CMR.00031-13
- 684 Stoll, B. J., Hansen, N. I., Sanchez, P. J., Faix, R. G., Poindexter, B. B., Van Meurs, K.  
685 P., . . . Human Development Neonatal Research, N. (2011). Early onset neonatal  
686 sepsis: the burden of group B Streptococcal and E. coli disease continues.  
687 *Pediatrics*, 127(5), 817-826. doi:10.1542/peds.2010-2217
- 688 Velilla, P. A., Rugeles, M. T., & Chougnet, C. A. (2006). Defective antigen-presenting  
689 cell function in human neonates. *Clin Immunol*, 121(3), 251-259.  
690 doi:10.1016/j.clim.2006.08.010
- 691 Wildhagen, K. C., Garcia de Frutos, P., Reutelingsperger, C. P., Schrijver, R., Areste,  
692 C., Ortega-Gomez, A., . . . Nicolaes, G. A. (2014). Nonanticoagulant heparin  
693 prevents histone-mediated cytotoxicity in vitro and improves survival in sepsis.  
694 *Blood*, 123(7), 1098-1101. doi:10.1182/blood-2013-07-514984
- 695 Xu, J., Zhang, X., Pelayo, R., Monestier, M., Ammollo, C. T., Semeraro, F., . . . Esmon,  
696 C. T. (2009). Extracellular histones are major mediators of death in sepsis. *Nat*  
697 *Med*, 15(11), 1318-1321. doi:10.1038/nm.2053



698 Yao, Y., Xie, Y., & Kim, K. S. (2006). Genomic comparison of Escherichia coli K1 strains  
699 isolated from the cerebrospinal fluid of patients with meningitis. *Infection and*  
700 *Immunity*, 74(4), 2196-2206. doi:10.1128/IAI.74.4.2196-2206.2006

701 Young, M. R., Newby, M., & Wepsic, H. T. (1987). Hematopoiesis and suppressor bone  
702 marrow cells in mice bearing large metastatic Lewis lung carcinoma tumors.  
703 *Cancer Res*, 47(1), 100-105. Retrieved from  
704 <https://www.ncbi.nlm.nih.gov/pubmed/2947676>

705

# FIGURE 1

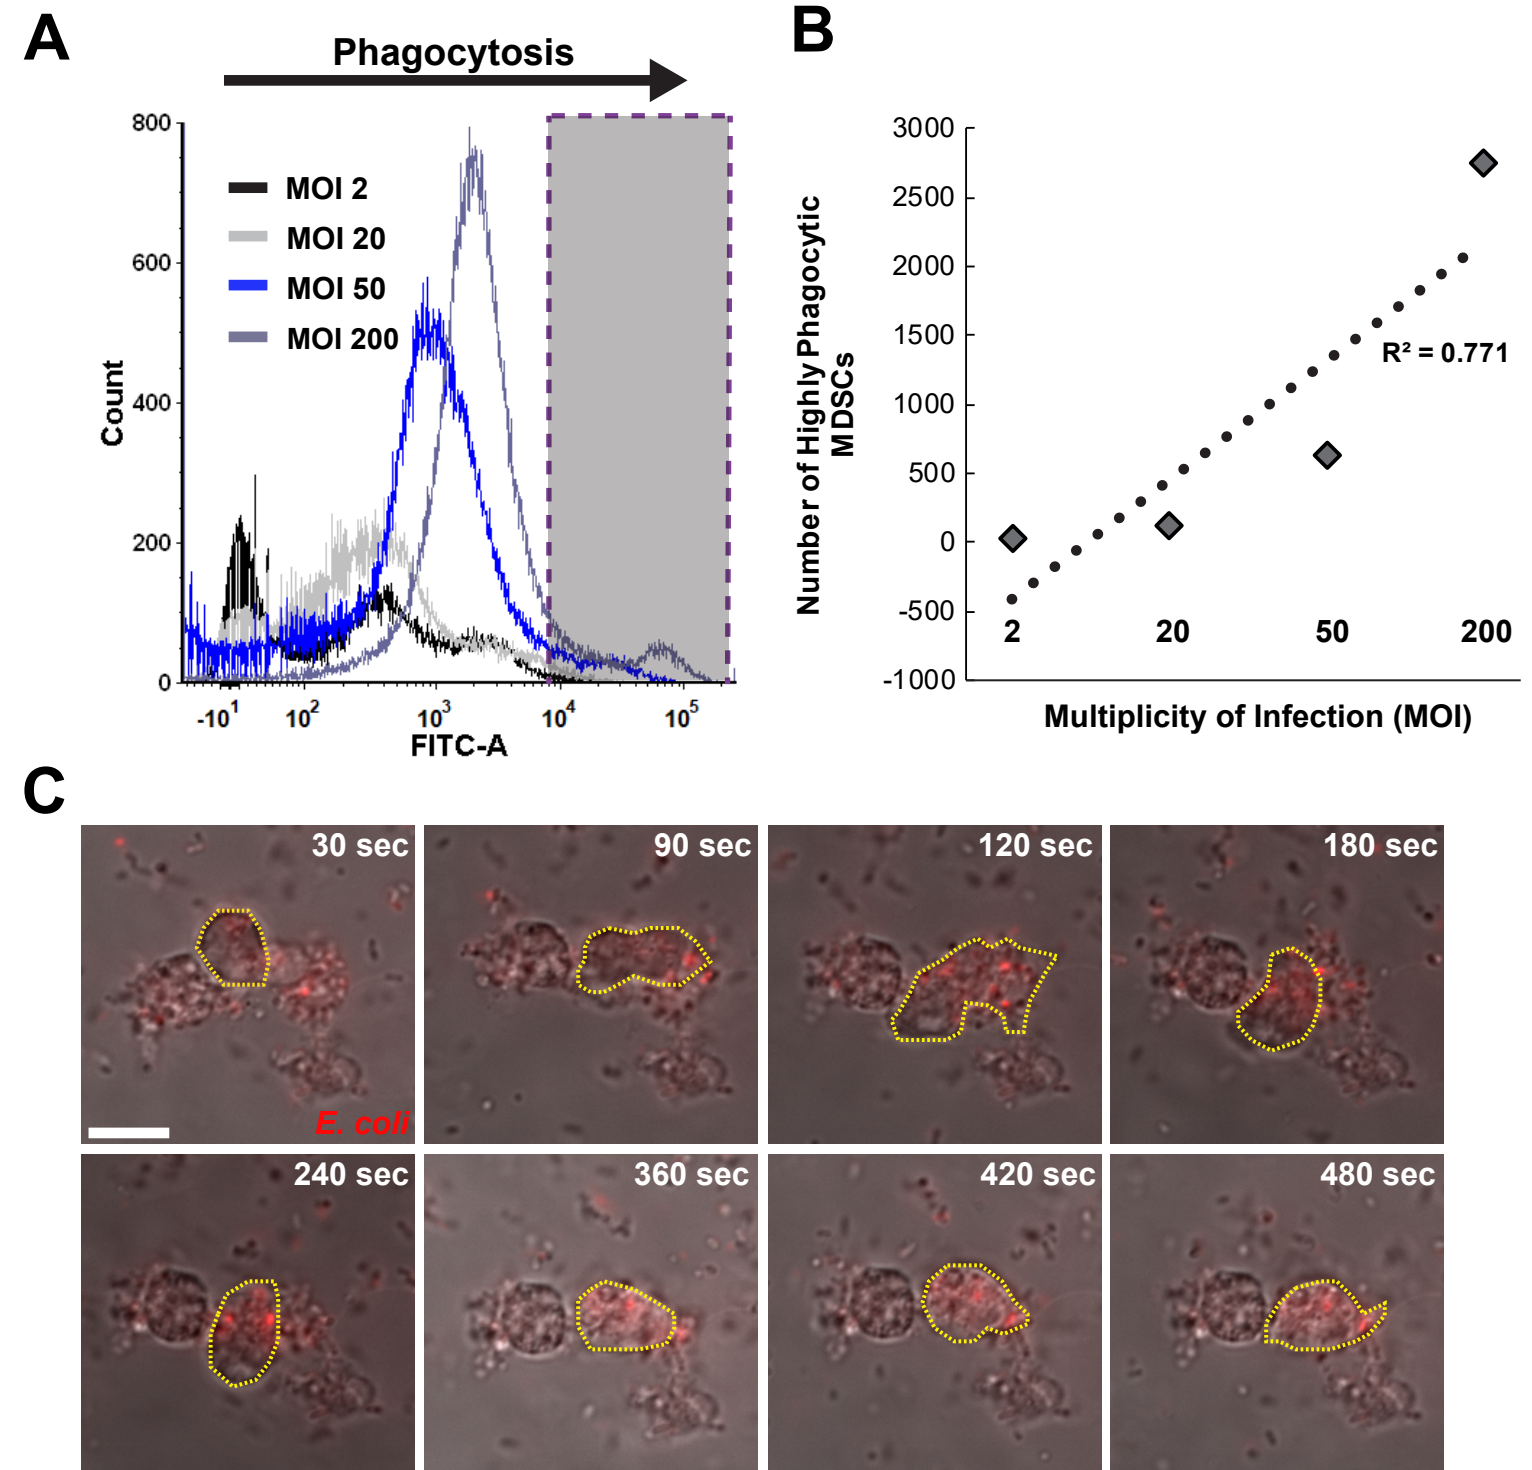

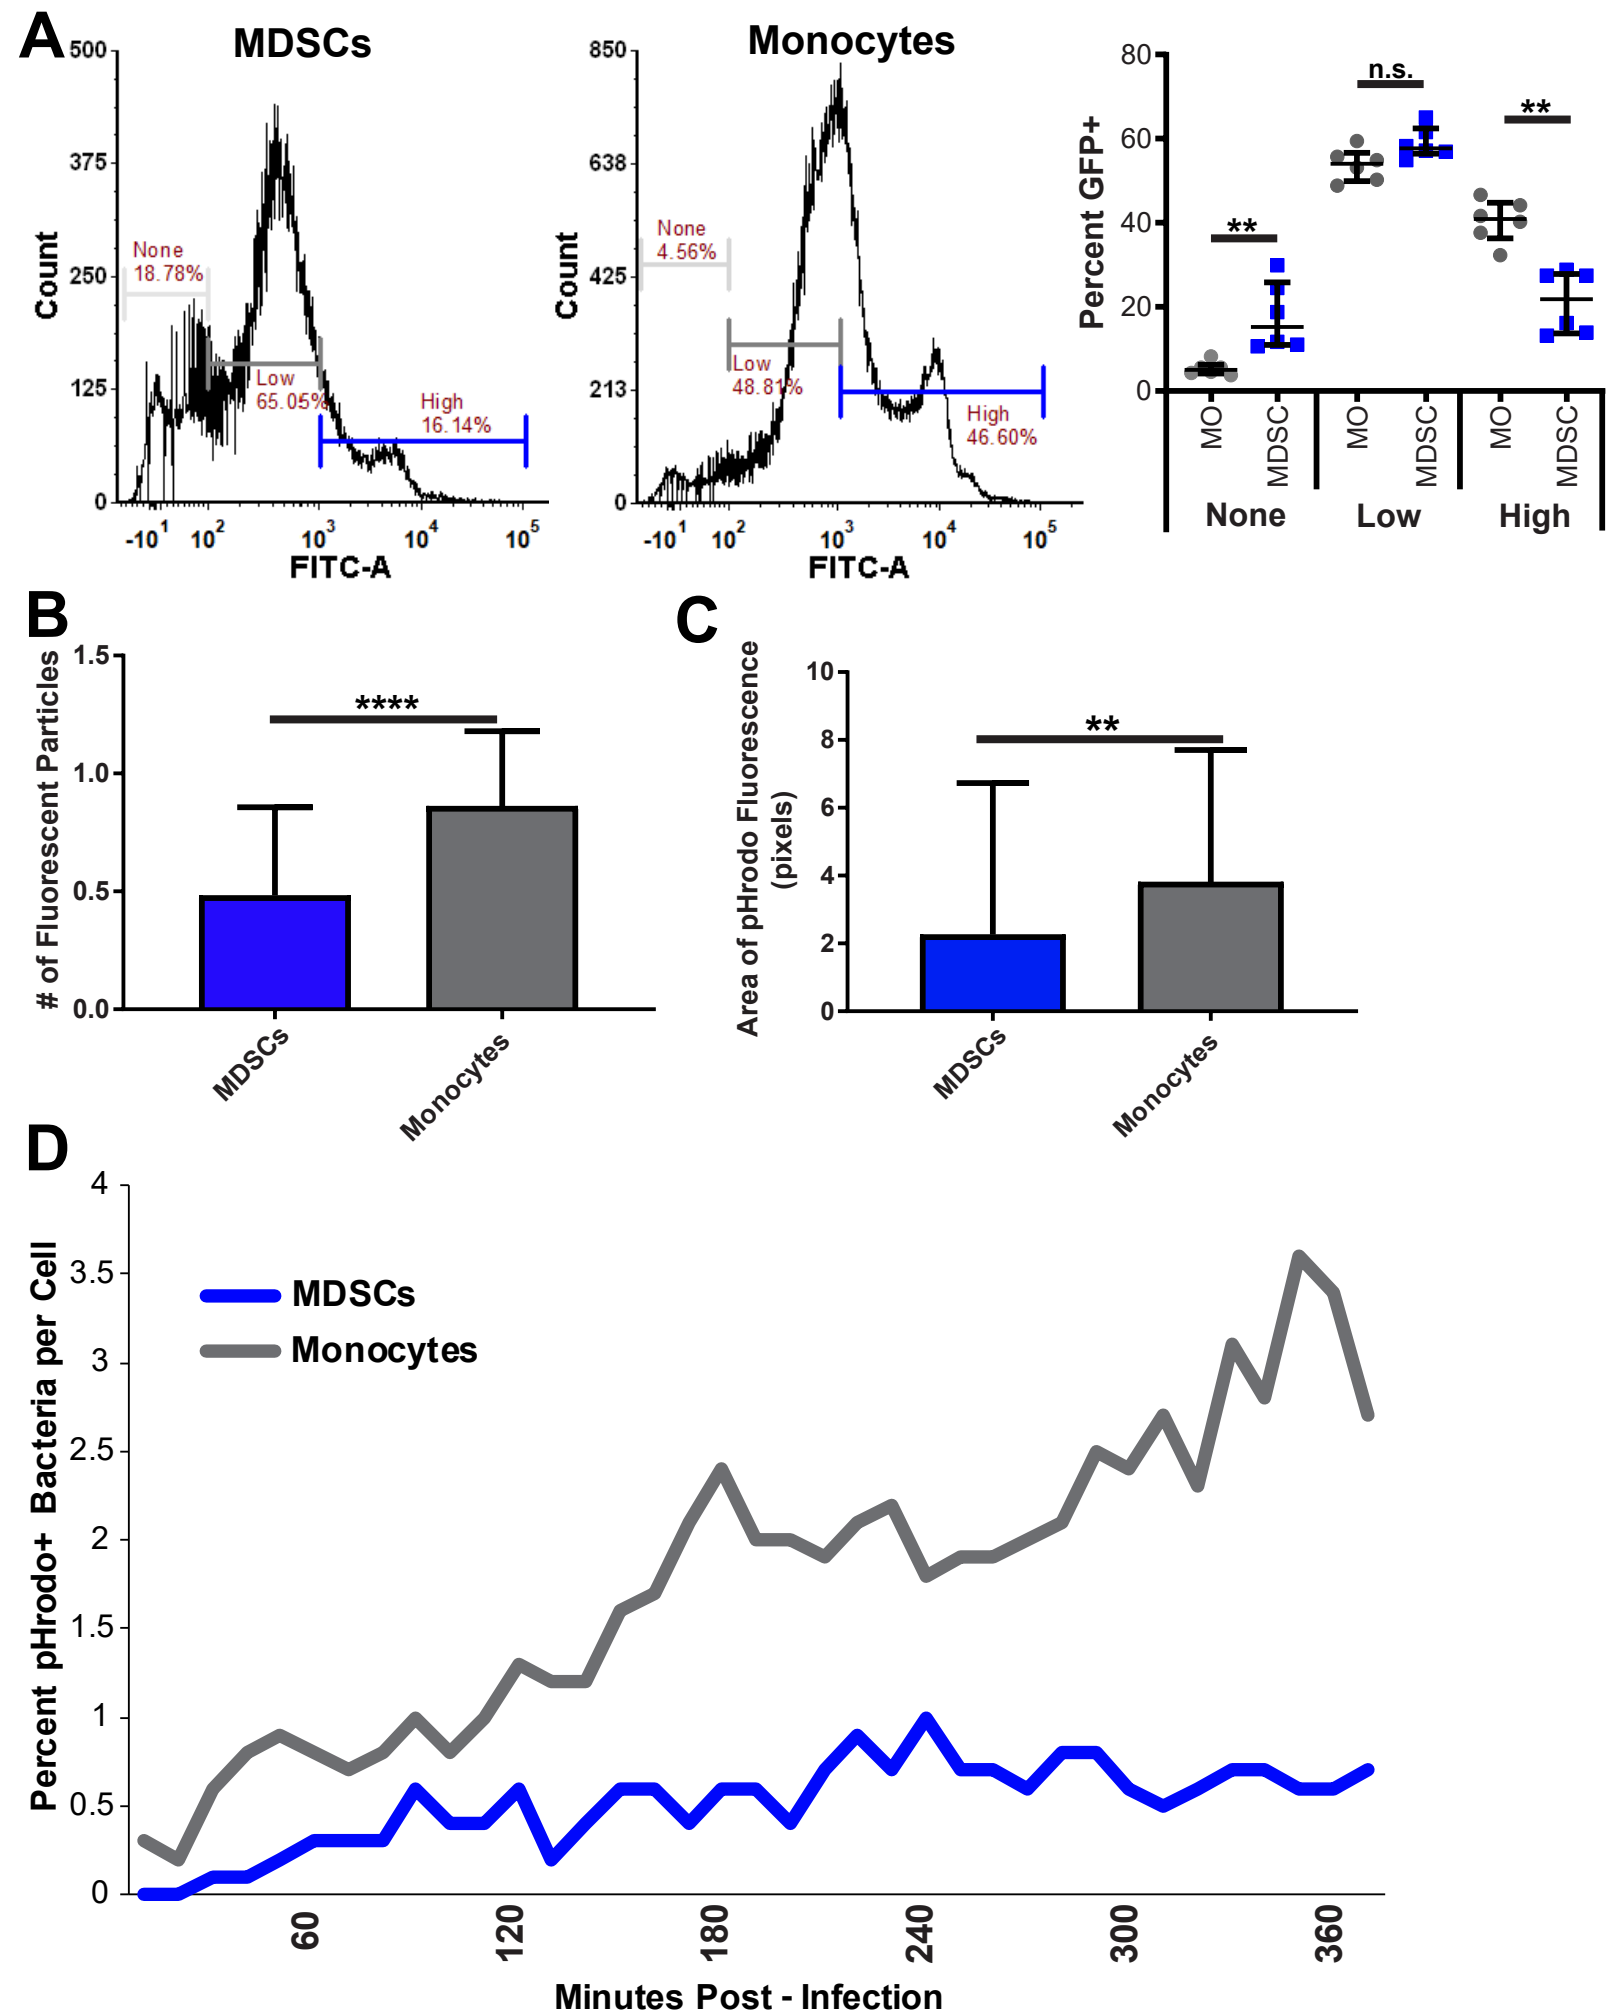

# FIGURE 3

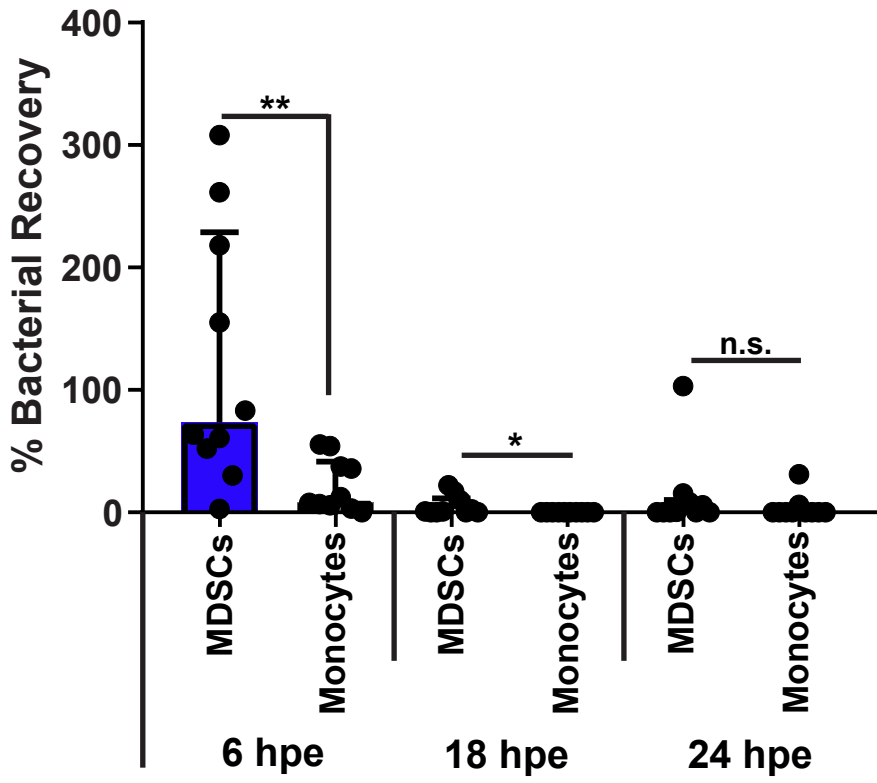

# FIGURE 4

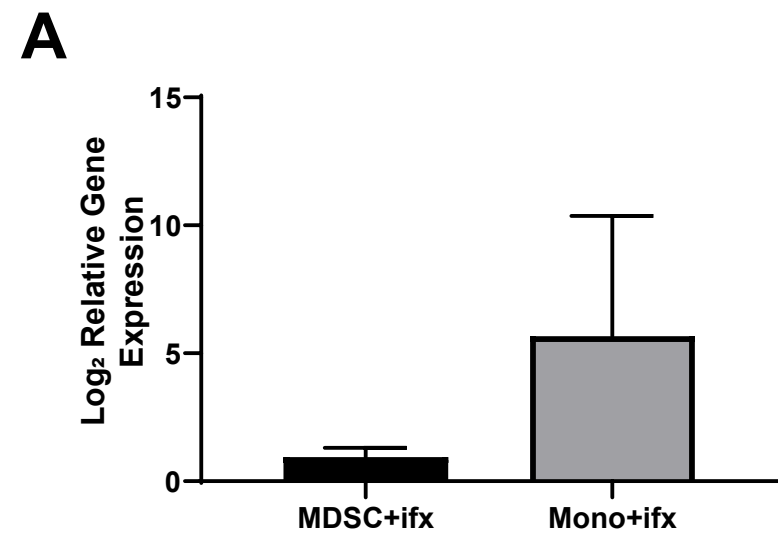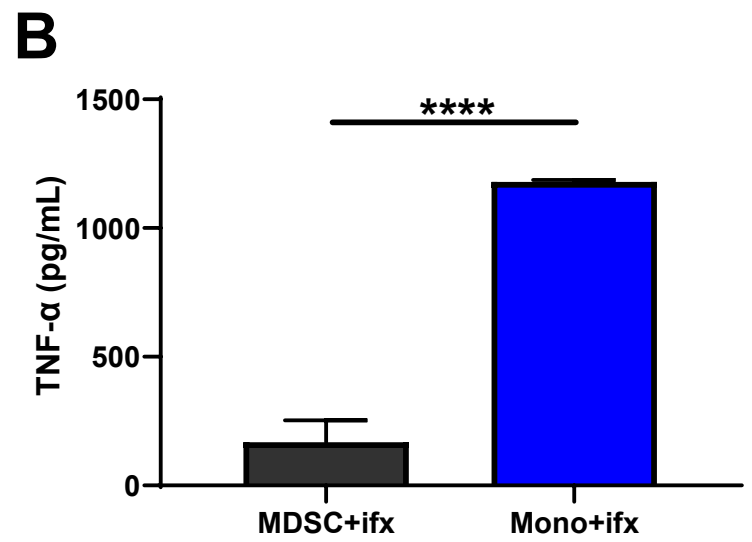

**A**

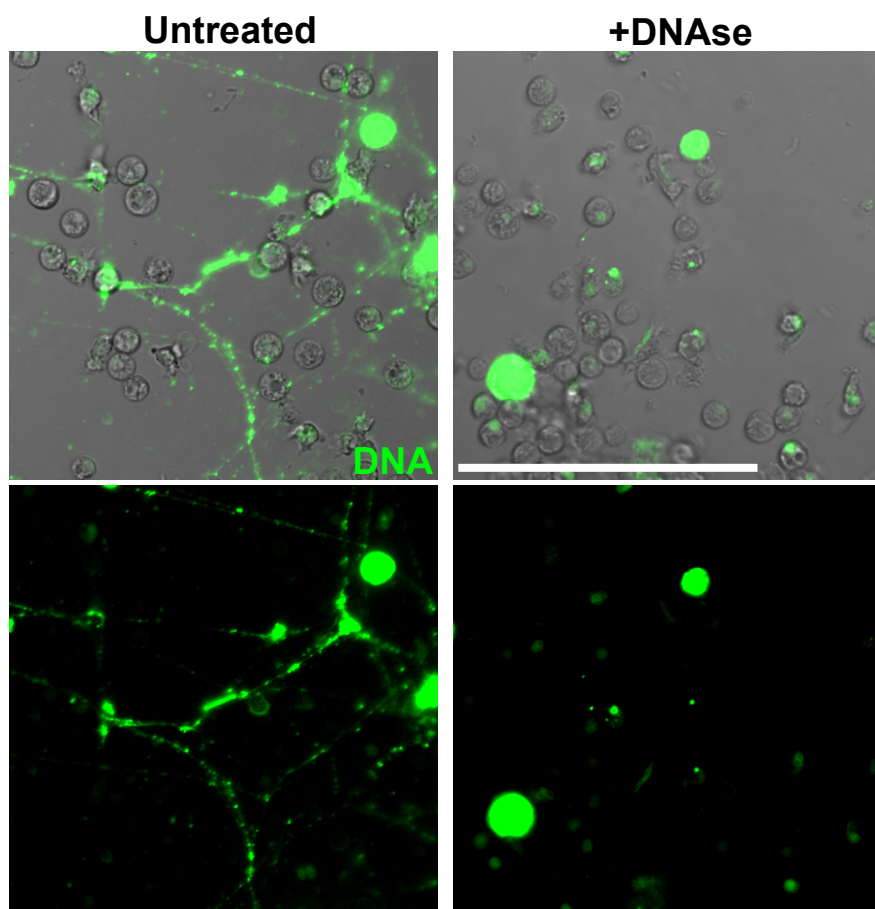

**B**

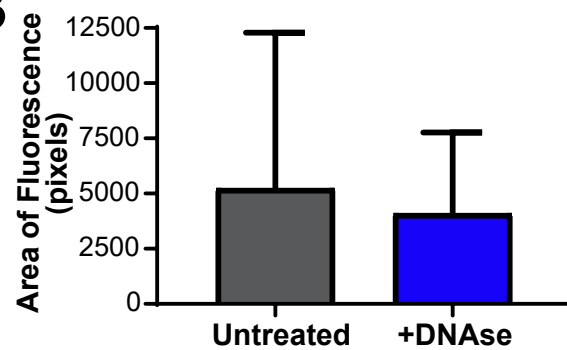

# FIGURE 6

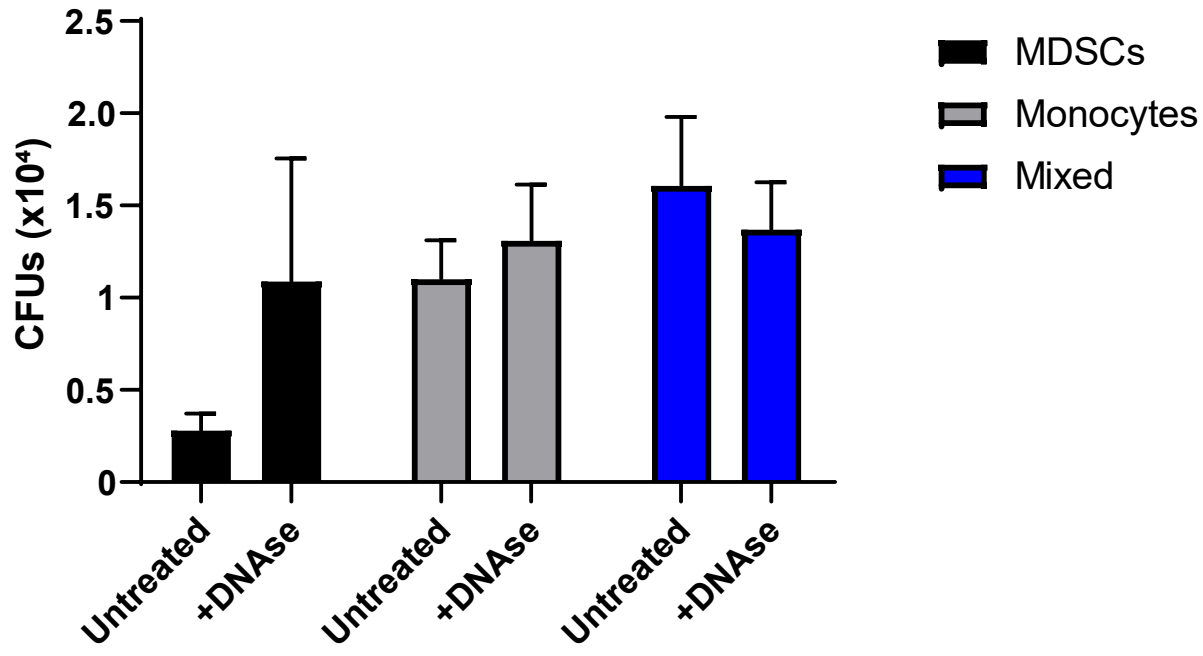

# SUPPLEMENTAL FIGURE 1

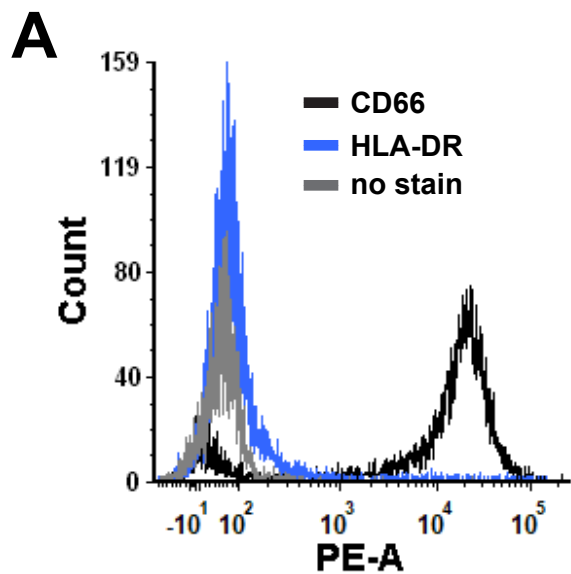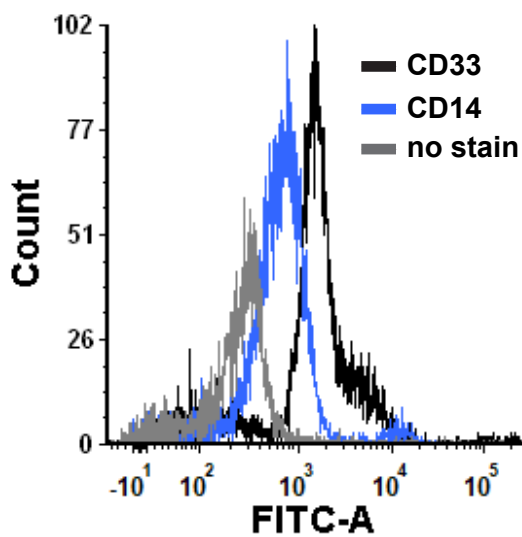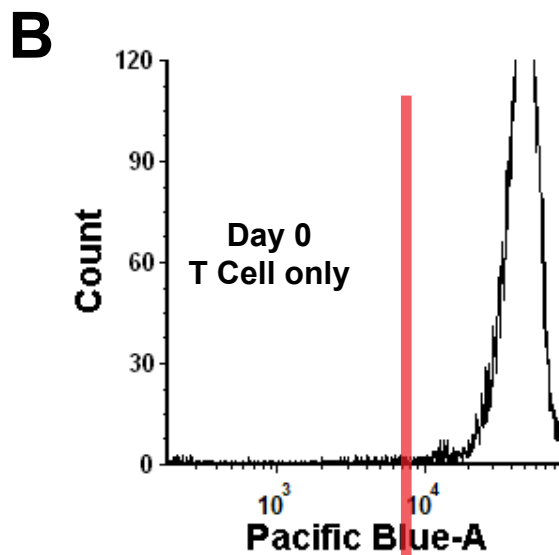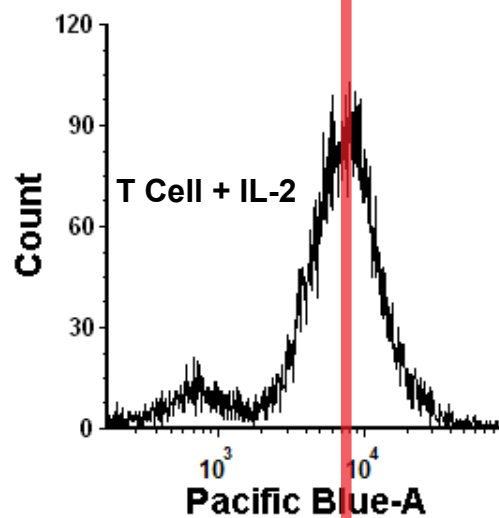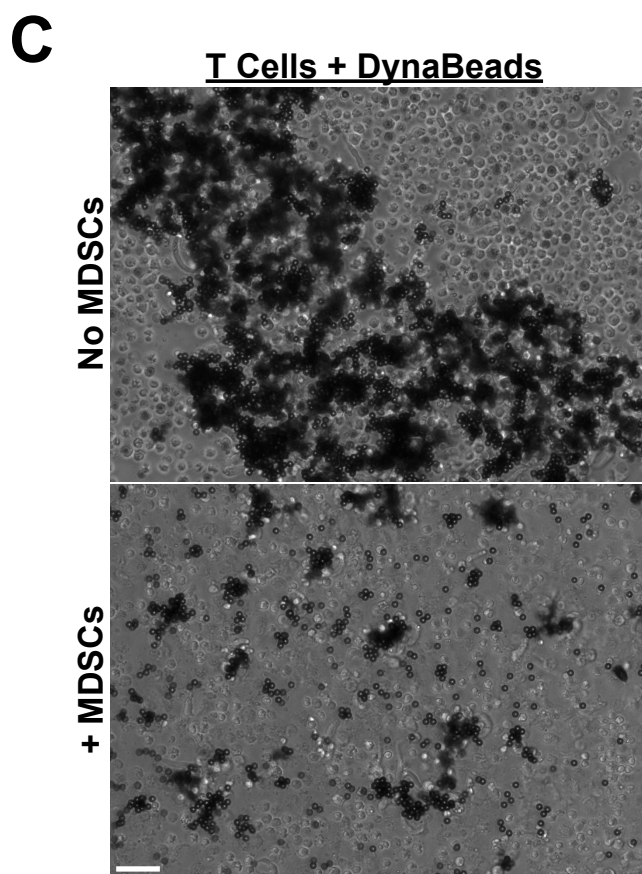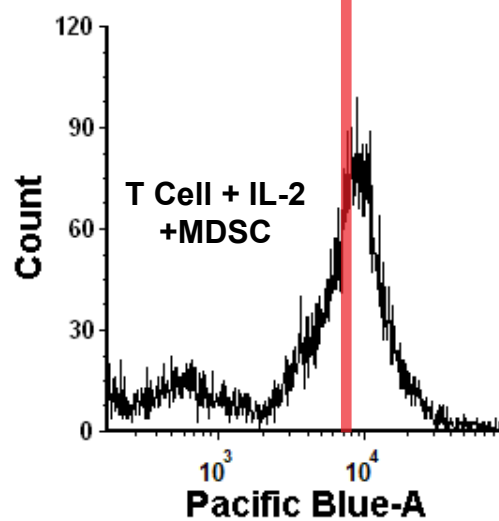

Source: https://www.biorxiv.org/content/10.1101/2019.12.30.891077v1.full.pdf
